# Supplementary material for: Plk1 Self-Organization and Priming Phosphorylation of HsCYK-4 at the Spindle Midzone Regulate the Onset of Division in Human Cells
Source: PubMed Central journal article supplement (PMC2680336; doi:10.1371/journal.pbio.1000111), 2009-05-26
Supplement: pbio.1000111.s004.pdf [file pbio.1000111.s004.pdf]

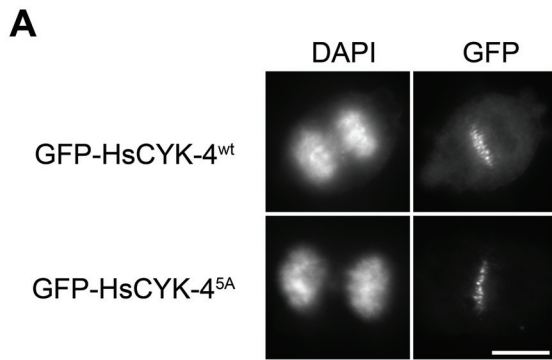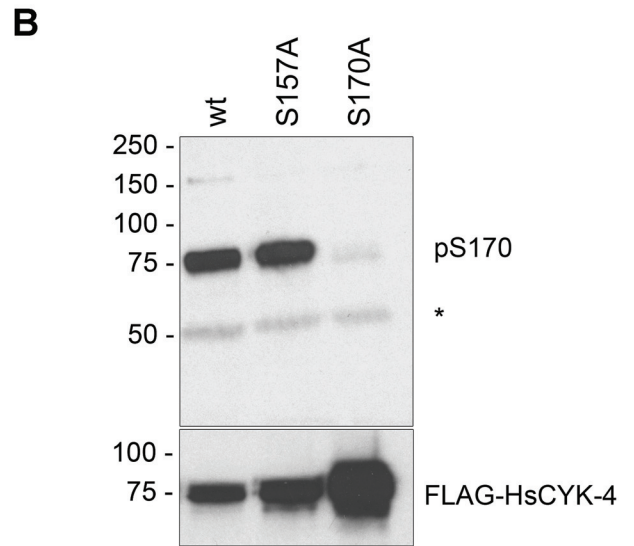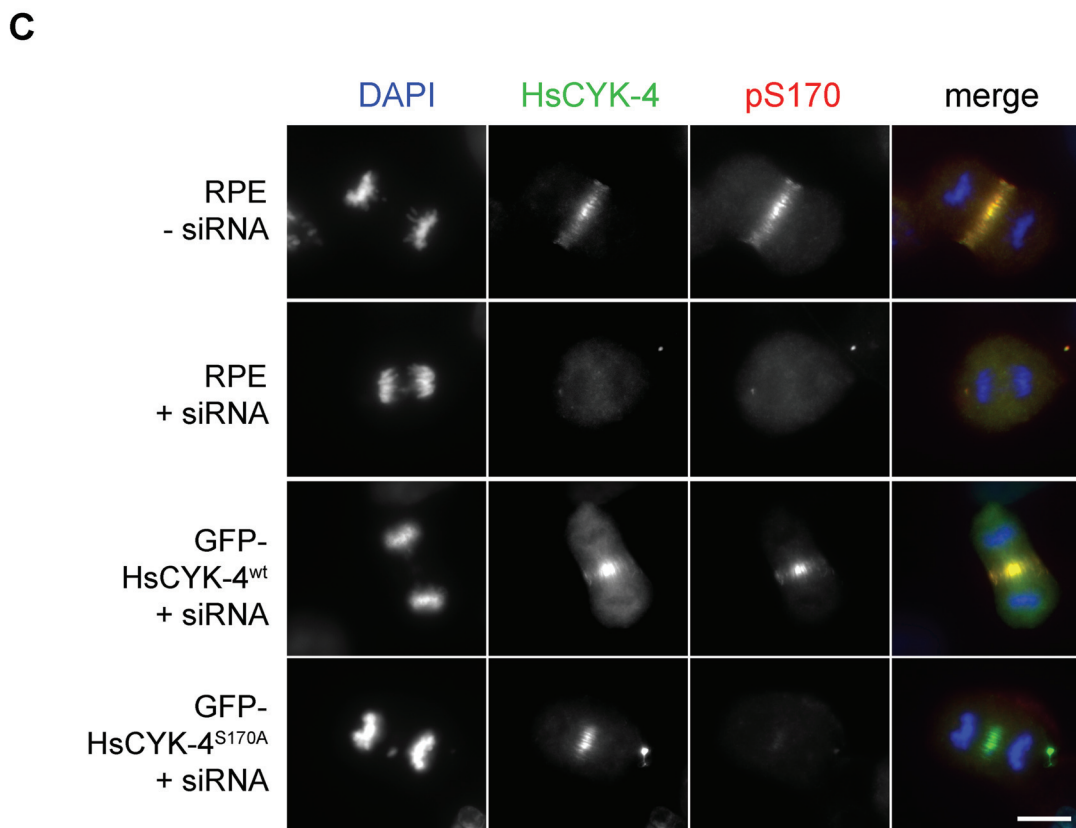

Figure S4
