# Supplementary material for: Plk1 Self-Organization and Priming Phosphorylation of HsCYK-4 at the Spindle Midzone Regulate the Onset of Division in Human Cells
Source: PLOS journal article supplement (doi:10.1371/journal.pbio.1000111), 2009-05-26

Figure S1

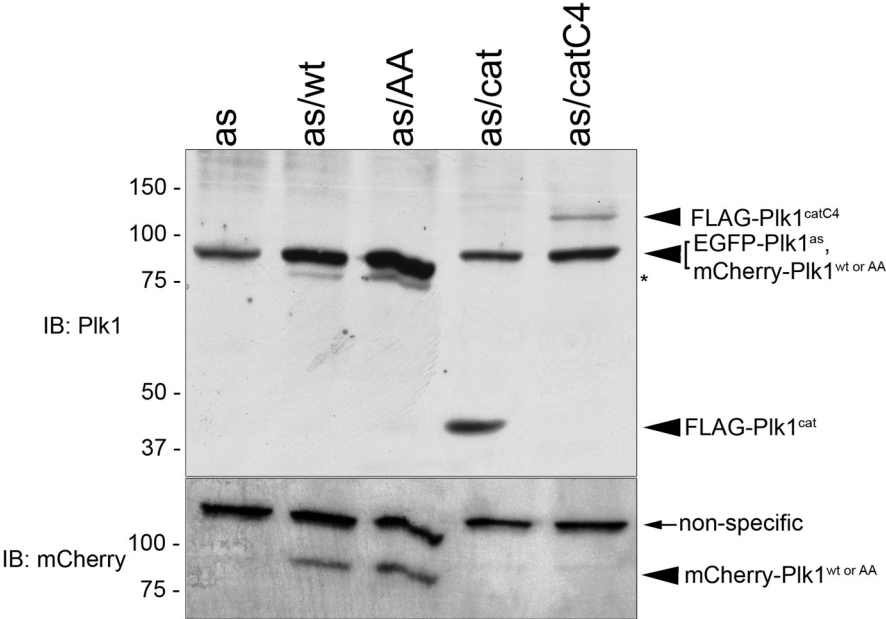

Supplement: S1 (10.1371/journal.pbio.1000111.s001) [file journal.pbio.1000111.s001]
